# Supplementary material
Source: PubMed Central journal article supplement (PMC6644281)
Supplement: ao7b00371_si_001.pdf [file ao7b00371_si_001.pdf]

# Supporting Information

## Graphene Oxide Coated Surface: Inhibition of Bacterial Biofilm Formation due to Specific Surface-Interface Interactions

*Nisha Yadav,<sup>a</sup> Amrita Dubey,<sup>b</sup> Swapnil Shukla,<sup>a</sup> Chetan Prakash Saini,<sup>c</sup> Govind Gupta,<sup>d</sup> Richa Priyadarshini,<sup>b\*</sup> and Bimlesh Lochab<sup>a\*</sup>*

<sup>a</sup>Department of Chemistry, School of Natural Sciences, Shiv Nadar University, Gautam Buddha Nagar, Uttar Pradesh, 201314, India.

<sup>b</sup>Department of Life Sciences, School of Natural Sciences, Shiv Nadar University, Gautam Buddha Nagar, Uttar Pradesh, 201314, India.

<sup>c</sup>Department of Physics, School of Natural Sciences, Shiv Nadar University, Gautam Buddha Nagar, Uttar Pradesh, 201314, India.

<sup>d</sup> Physics of Energy Harvesting, TEC Building, CSIR-National Physical Laboratory, Dr. K.S. Krishnan Marg, New Delhi-110 012, India.

### TABLE OF CONTENTS

1. Digital images of GO coated well plates of different GO solid content loading ----- S3
2. AFM (3D) images of GO<sub>H</sub> and GO<sub>I</sub> films and representative height distribution ----- S4
3. Hydrodynamic mean diameter and size distribution of GO<sub>H</sub> and GO<sub>I</sub> -----S5

4. Quantitative analysis of antibacterial activity of GO<sub>H</sub> coated surface against *E. coli* bacterial biofilm formation -----S6
5. 3D AFM images of *E. coli* and *S. aureus* cells after incubation with GO<sub>I</sub> coated substrate --  
----- S7
6. Images of contact angle measurements using MilliQ water in contact with (a) polystyrene (PS) substrate (control), (b) GO<sub>H</sub> coated on PS and (c) GO<sub>I</sub> coated on PS----- S8
7. *Invitro* glutathione oxidation induced by GO nanomaterials ---- S9
8. Antimicrobial activity of GO<sub>H</sub> and GO<sub>I</sub> with different concentration ----- S10
9. Spot assay representing antimicrobial activity of GO<sub>I</sub> and GO<sub>H</sub> on (a) *E. coli* and (b) *S. aureus*-----S11
10. Table-1. A series of different GO solid content-----S12
11. Table-2. Surface thickness measurement of GO<sub>H</sub> and GO<sub>I</sub> coated surface using surface profilometer-----S13
12. Table-3. XRD data and XPS deconvoluted percentage component of GO<sub>H</sub> and GO<sub>I</sub> -----S14
13. Table-4. Comparison of our GO coated substrate with previously reported literature in terms of percentage inhibition at the respective concentration. -----S15
14. References-----S16

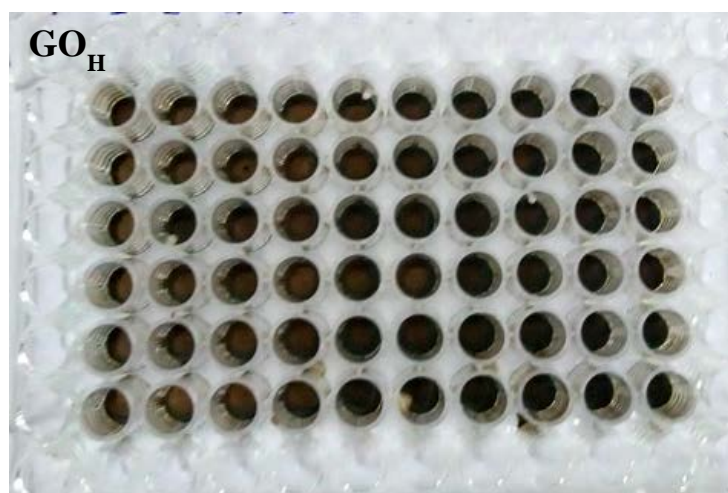

Increasing GO content

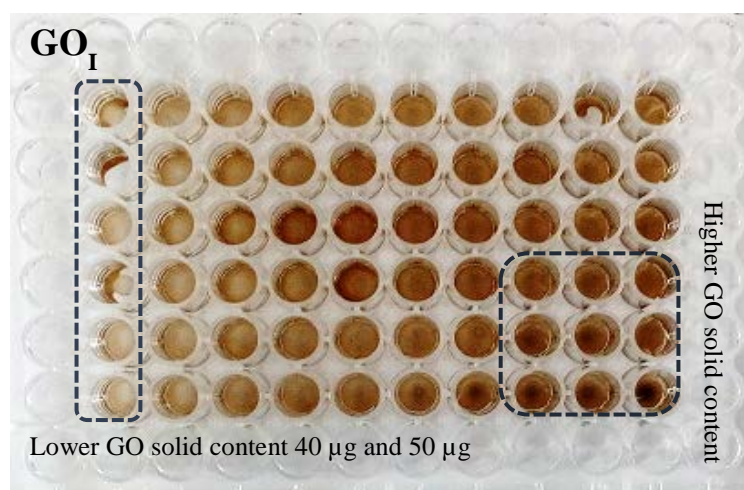

Increasing GO content

**Figure S1.** Digital images of GO coated well plates of different GO solid content loading.

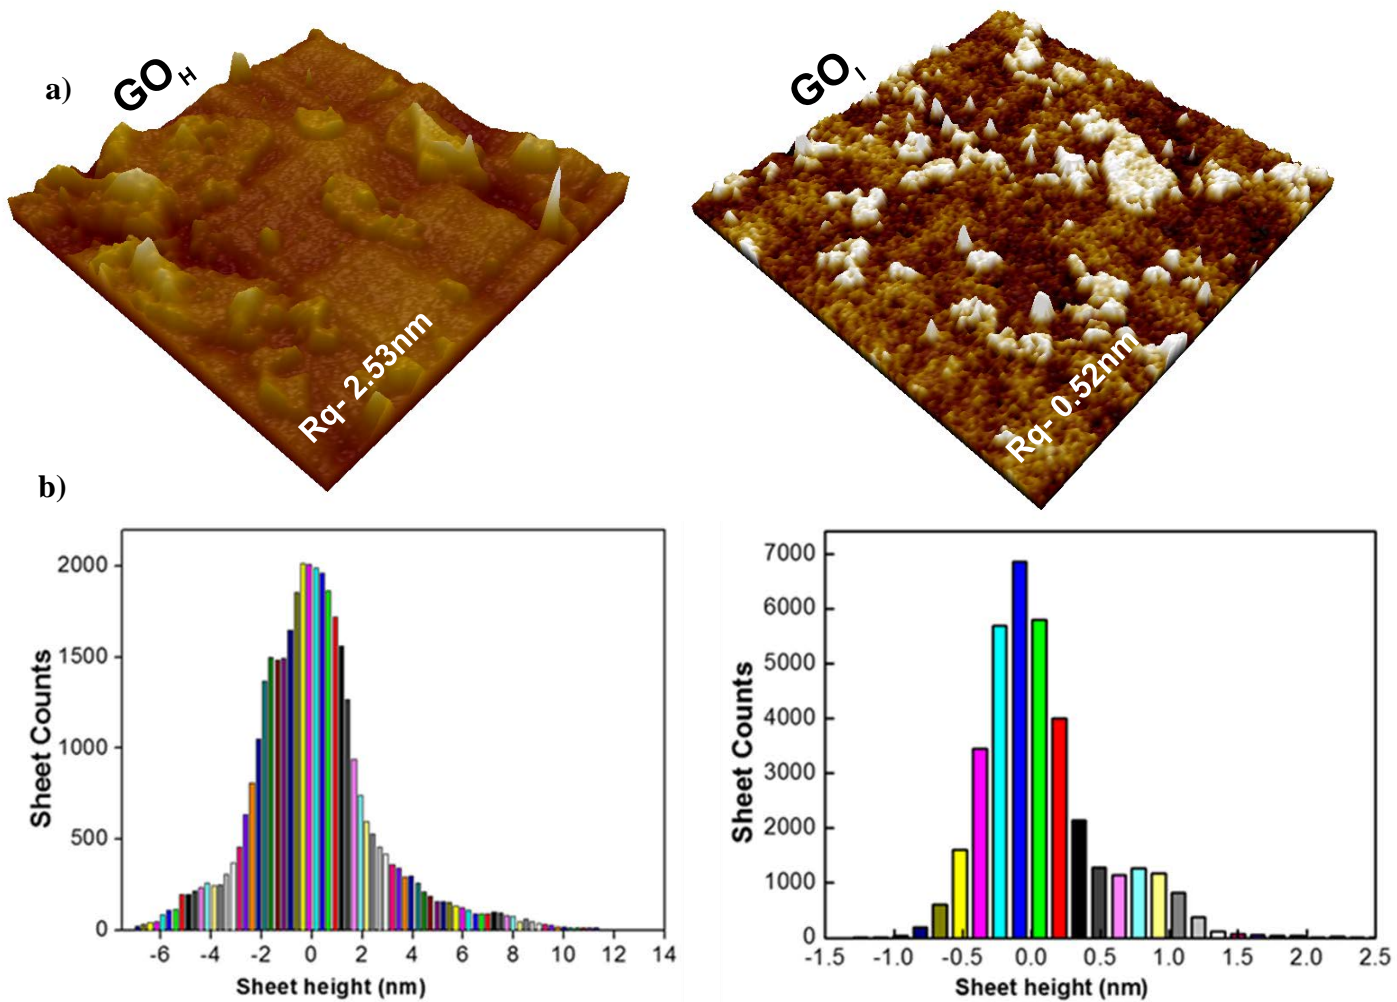

**Figure S2.** AFM imaging Graphene Oxide ( $GO_H$  and  $GO_L$ ) deposited on a Si substrate and corresponding Rq values (a) 3D-AFM images (b) Sheet height distribution.

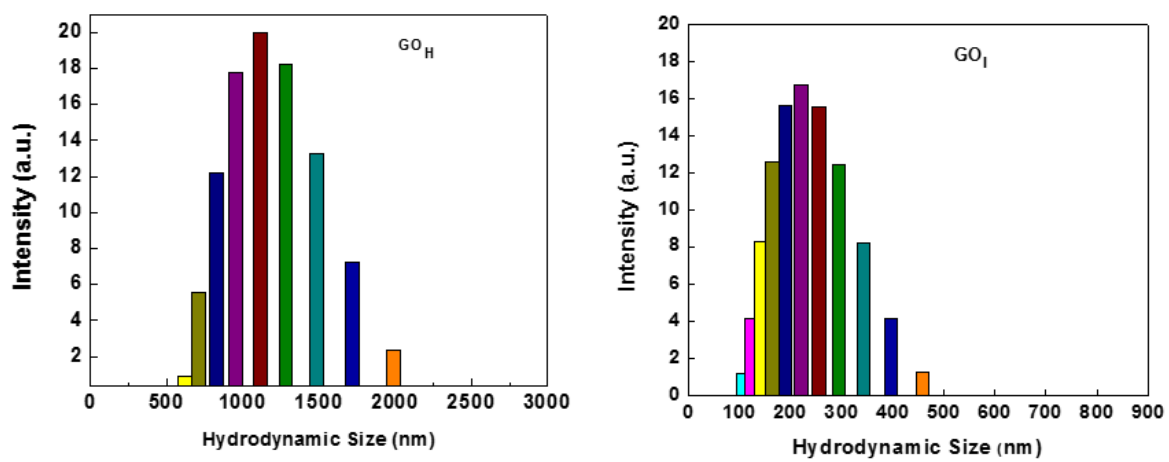

**Figure S3.** Hydrodynamic mean diameter and size distribution of  $GO_H$  and  $GO_I$ .

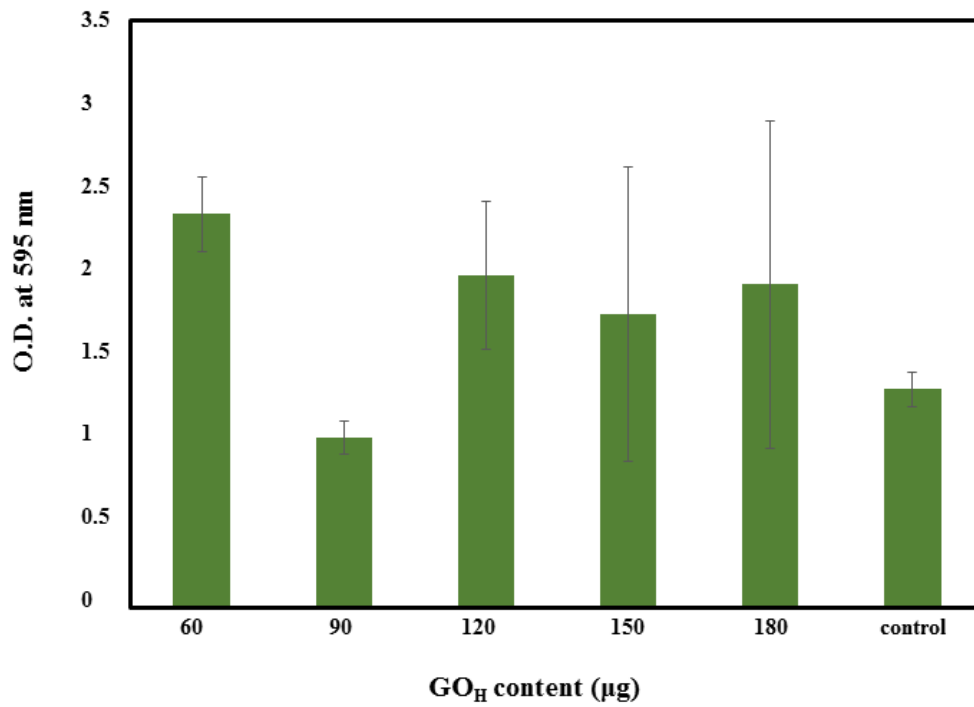

**Figure S4.** Quantitative analysis of antibacterial activity of GO<sub>H</sub> coated surface against *E. coli* bacterial biofilm formation. Graphical representation of percentage biofilm inhibition in *E. coli*. Data represented here shows statistical difference (p-value < 0.05) between the GO<sub>H</sub> treated and control sample.

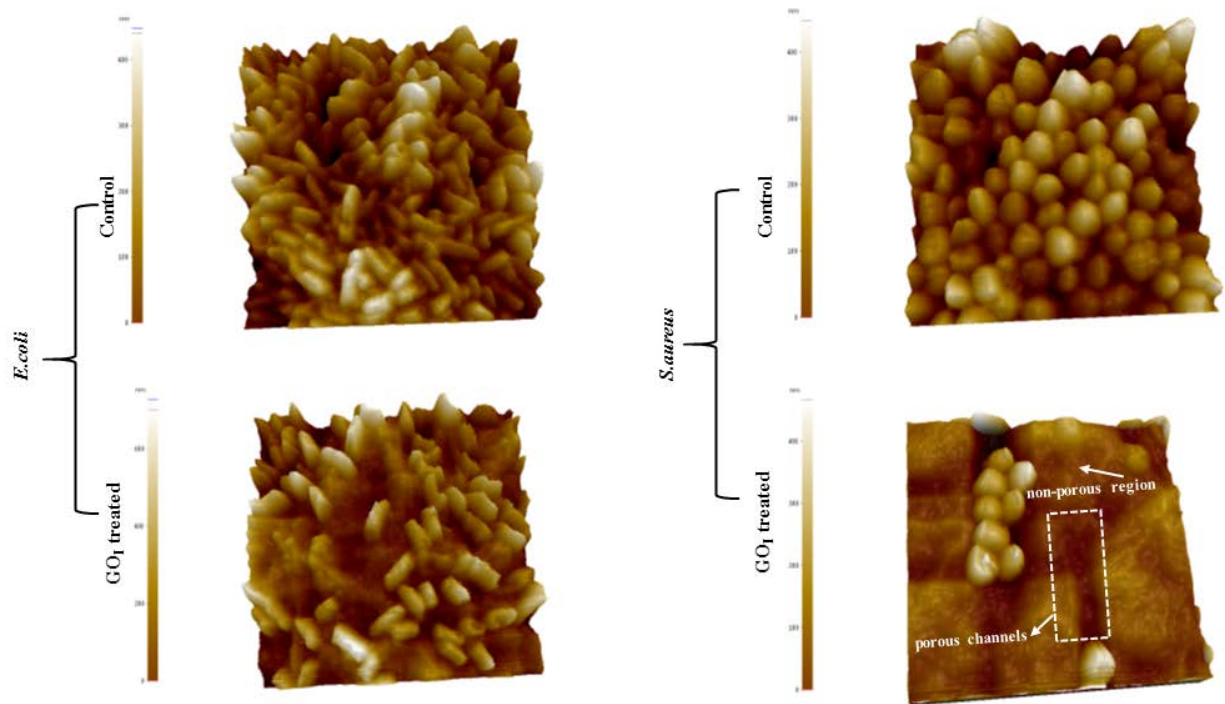

**Figure S5.** 3D AFM images of *E. coli* and *S. aureus* cells after incubation with GO<sub>1</sub> coated substrate. The control without GO nanosheets showed a dense biofilm formation, while GO<sub>1</sub> coated substrate showed a few cell colony of bacteria formation within the porous channels of GO-coated substrate and localized within the channels.

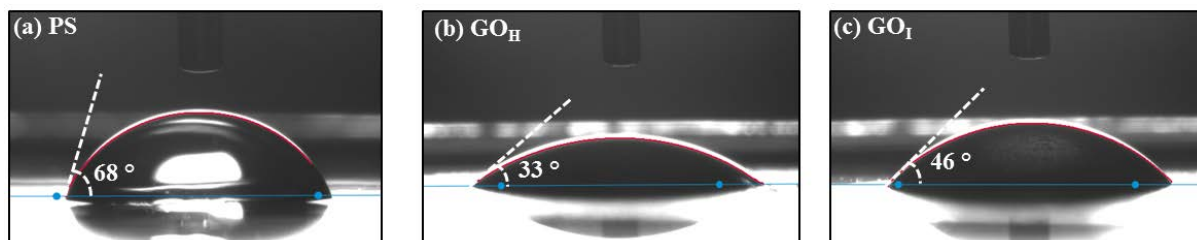

**Figure S6.** Images of contact angle measurements using MilliQ water in contact with (a) polystyrene (PS) substrate (control), (b) GO<sub>H</sub> coated on PS and (c) GO<sub>I</sub> coated on PS.



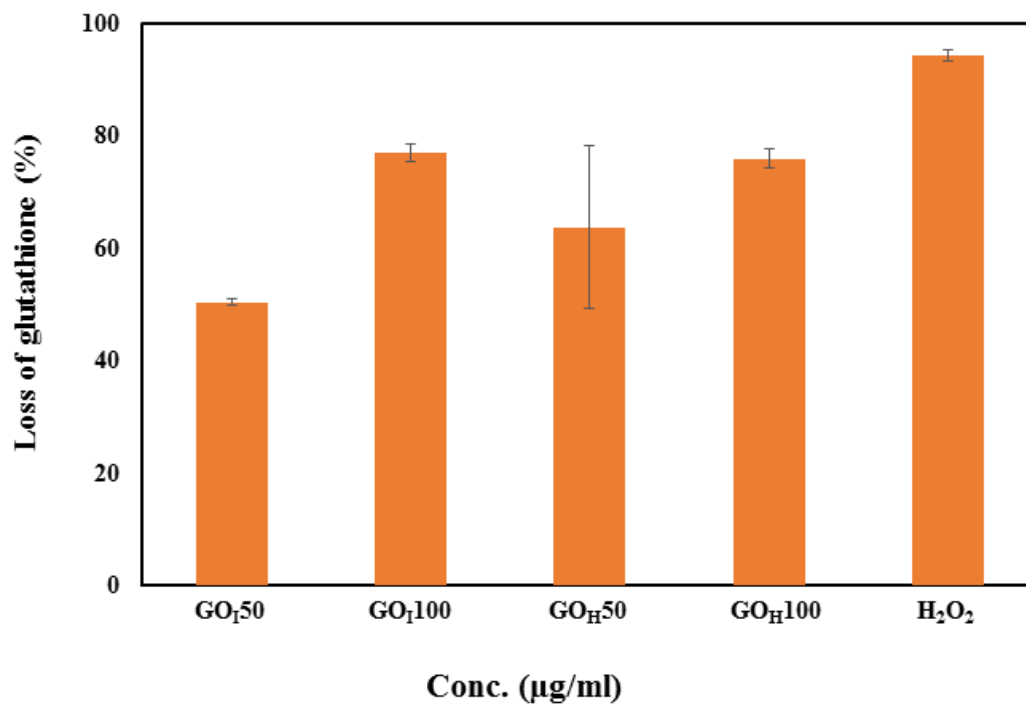

**Figure S7.** *In vitro* glutathione oxidation induced by GO nanomaterials: 50 µg/mL and 100 µg/mL of GO<sub>H</sub> and GO<sub>I</sub> were incubated with 0.8 mM glutathione under for 3 h. H<sub>2</sub>O<sub>2</sub> (1 mM) represents positive control.

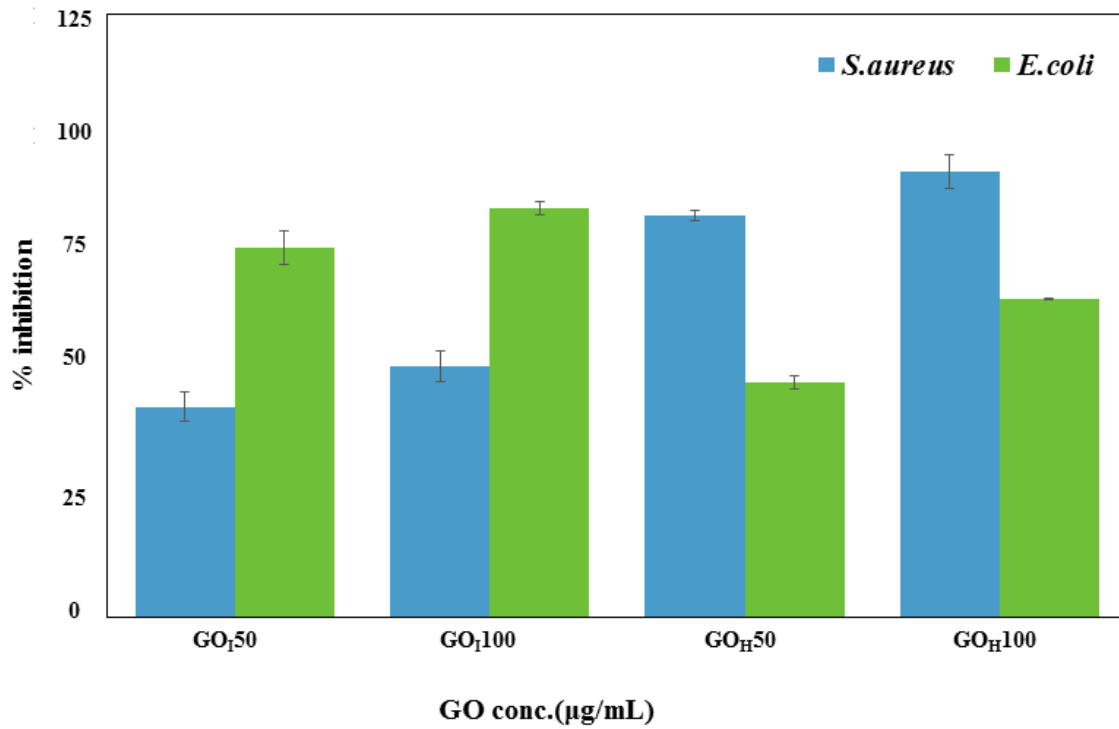

**Figure S8.** Antimicrobial activity of GO<sub>H</sub> and GO<sub>I</sub>. *E. coli* and *S. aureus* cells were incubated with different concentration (50 μg/mL and 100 μg/mL) of GO<sub>H</sub> and GO<sub>I</sub>. Error bars in the figure represents standard deviation.

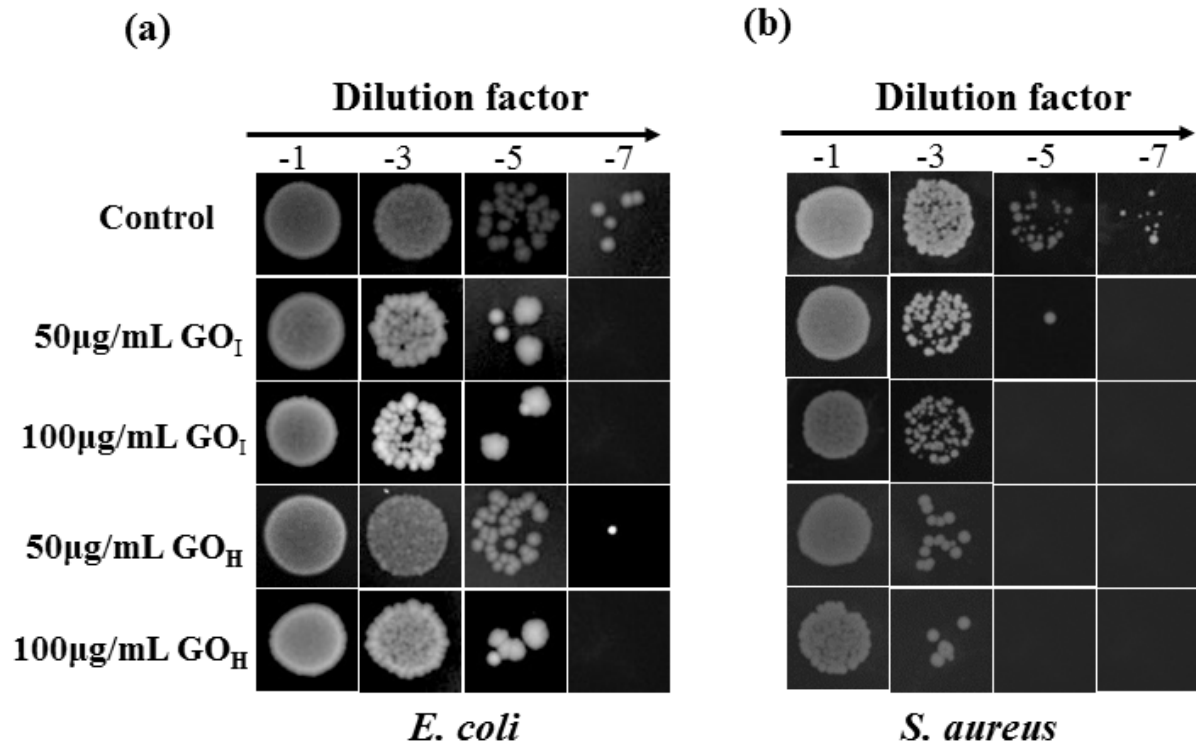

**Figure S9.** Spot assay representing antimicrobial activity of GO<sub>I</sub> and GO<sub>H</sub> at 50 µg/mL and 100 µg/mL (a) *E. coli* and (b) *S. aureus*.

S11

| <b>GO solid content<br/>(<math>\mu\text{g}</math>)</b> | <b>GO<br/>(2 mg/mL)<br/>(<math>\mu\text{l}</math>)</b> | <b>H<sub>2</sub>O<br/>(<math>\mu\text{l}</math>)</b> |
|--------------------------------------------------------|--------------------------------------------------------|------------------------------------------------------|
| 60                                                     | 30                                                     | 220                                                  |
| 90                                                     | 45                                                     | 205                                                  |
| 120                                                    | 60                                                     | 190                                                  |
| 150                                                    | 75                                                     | 175                                                  |
| 180                                                    | 90                                                     | 160                                                  |
| 200                                                    | 100                                                    | 150                                                  |

**Table S1:** A series of different GO solid content (ranging from 60  $\mu\text{g}$  to 200  $\mu\text{g}$ ) was prepared from the stock aqueous suspension of respective GO (2 mg/mL) onto 96-well plate. The volume of solvent was kept constant (250  $\mu\text{L}$ ) in each well of the plate to allow similar extent of drying in an air-oven at 50 °C for 4 h.

| <b>Sample</b>   | <b>GO solid content<br/>(<math>\mu\text{g}</math>)</b> | <b>Thickness<sub>at edge</sub><br/>(nm)</b> | <b>Thickness<sub>in middle</sub><br/>(nm)</b> | <b>Difference<br/>(nm)</b> |
|-----------------|--------------------------------------------------------|---------------------------------------------|-----------------------------------------------|----------------------------|
| GO <sub>H</sub> | 60                                                     | 624                                         | 742                                           | 118                        |
|                 | 200                                                    | 825                                         | 1161                                          | 336                        |
| GO <sub>I</sub> | 60                                                     | 51                                          | 88                                            | 37                         |
|                 | 200                                                    | 321                                         | 351                                           | 30                         |

**Table S2:** Surface thickness measurement of GO<sub>H</sub> and GO<sub>I</sub> coated surface using surface profilometer. The results reported are the average of three measurements in different directions.

| Sample          | XRD        |       | XPS (% Component)           |                              |                                |                      |
|-----------------|------------|-------|-----------------------------|------------------------------|--------------------------------|----------------------|
|                 | 2 $\theta$ | d (Å) | C-C, C=C, C-H<br>(285.0 eV) | C-OH,<br>Epoxy<br>(286.2 eV) | C=O,<br>Carbonyl<br>(288.1 eV) | O=C-OH<br>(289.6 eV) |
| GO <sub>H</sub> | 11.25      | 7.8   | 6.8                         | 41.4                         | 39.9                           | 11.9                 |
| GO <sub>I</sub> | 9.8        | 9.04  | 18.7                        | 53.3                         | 23.6                           | 4.4                  |

**Table S3:** XRD data (d – Interlayer spacing) and XPS deconvoluted percentage component of GO<sub>H</sub> and GO<sub>I</sub>.

| Study                                                 | Synthetic Method for GO preparation | Bacterial Strain                                               | Concentration/sonication time                                              | Inhibition (%)                                                                       | Ref.      |
|-------------------------------------------------------|-------------------------------------|----------------------------------------------------------------|----------------------------------------------------------------------------|--------------------------------------------------------------------------------------|-----------|
| GO coated surface for inhibition of Biofilm formation | Improved Hummers                    | <i>E. coli</i><br><i>S. aureus</i>                             | >150µg GO solid content                                                    | ≥ 100 in <i>E.coli</i><br><br>88% in <i>S. aureus</i><br><br>(in Biofilm inhibition) | This work |
| Suspension                                            | Improved                            | <i>E. coli</i>                                                 | 100 µg/mL<br><br>/2 min.                                                   | 85                                                                                   | This work |
|                                                       | Hummers                             | <i>S. aureus</i>                                               | 100 µg/mL<br><br>/2 min.                                                   | 93                                                                                   |           |
| Suspension                                            | Modified Hummers and Offeman        | <i>E. coli</i>                                                 | 40 µg/mL<br><br>/n.a.                                                      | 69.3                                                                                 | 1         |
| Suspension                                            | Modified Hummers and Offeman        | <i>E.coli</i>                                                  | 40 µg/mL<br><br>/0-240                                                     | 97.7-45.5                                                                            | 2         |
| Suspension and coated cellulose filter                | Modified Hummers and Offeman        | <i>E.coli</i>                                                  | 400 µg solid GO content for coated and 200 µg for Suspension<br><br>/0-120 | 79-21 for coated<br><br>70-27 for Suspension                                         | 3         |
| Highly wrinkled GO films                              | Modified Hummers and Offeman        | <i>E. coli</i> ,<br><i>S. aureus</i> ,<br><i>Mycobacterium</i> | Surface roughness Rq-500nm<br><br>>1000µg/mL                               | 80                                                                                   | 4         |

**Table S4:** Comparison of our GO coated substrate with previously reported literature in terms of percentage inhibition at the respective concentration.

S15

## References

- 1) Liu, S.; Zeng, T.H.; Hofmann, M.; Burcombe, E.; Wei, J.; Jiang, R.; Kong, J.; Chen, Y. Antibacterial Activity of Graphite, Graphite Oxide, Graphene Oxide, and Reduced Graphene Oxide: Membrane and Oxidative Stress. *ACS Nano*, **2011**, *5*, 6971-6980.
- 2) Liu, S.; Hu, M.; Zeng, T.H.; Wu, R.; Jiang, R.; Wei, J.; Wang, L.; Kong, J.; Chen, Y. Lateral Dimension-Dependent Antibacterial Activity of Graphene Oxide Sheets. *Langmuir*, **2012**, *28*, 12364–12372.
- 3) Perreault, F.; de Faria, A. F.; Nejati, S.; Elimelech, M. Antimicrobial Properties of Graphene Oxide Nanosheets: Why Size Matters. *ACS Nano*, **2015**, *9*, 7226- 7236.
- 4) Zou, F.; Zhou, H.; Jeong, D. Y.; Kwon, J.; Eom, S. U.; Park, T. J.; Hong S. W.; Lee, J. Wrinkled Surface-Mediated Antibacterial Activity of Graphene Oxide Nanosheets. *ACS Appl. Mater. Interfaces*, **2017**, *9*, 1343–1351.
